# Supplementary material for: Genetic Characterization of Gardenia jasminoides Ellis Genotypes Derived from Seeds and Selection Based on Their Morphological Traits and Flower Aromatic Substances
Source: MDPI journal article supplement (doi:10.3390/agriculture14050650), 2024-04-23
Supplement: s1 [file s1]

**Table S1.** Analysis of molecular variance (AMOVA) of *G. jasminoides* genotypes.

| Source of variation | df | SS       | MS      | Percentage of variation | Total variance (%) | Fixation index      |
|---------------------|----|----------|---------|-------------------------|--------------------|---------------------|
| Among populations   | 4  | 612.653  | 153.163 | 18.772                  | 49%                | $\Phi_{st} = 0.488$ |
| Within populations  | 31 | 609.875  | 19.673  | 19.673                  | 51%                | $p < 0.001$         |
| Total               | 35 | 1222.528 |         | 38.445                  | 100%               |                     |

df, degree of freedom; SS, Sum of square; MS, Mean square;  $\Phi_{st}$ , level of genetic differentiation between populations.

**Table S2.** Analysis of heterozygosity (mean  $\pm$  SE) among *G. jasminoides* cultivars.

|                       | 'Long Lasting'    | 'Blanco Arbusto'  | 'Hedge Flower'    | 'New Magnifica'   | Reference cultivars |
|-----------------------|-------------------|-------------------|-------------------|-------------------|---------------------|
| Heterozygosity (mean) | 0.124 $\pm$ 0.012 | 0.137 $\pm$ 0.013 | 0.175 $\pm$ 0.014 | 0.170 $\pm$ 0.013 | 0.186 $\pm$ 0.013   |

**Table S3.** Mean values (numerical) of seven morphological traits of ornamental interest measured in the 32 seed-derived genotypes and the four reference cultivars of *G. jasminoides*.

| Genotype    | Number of petals | Flower weight (g) | Flower diameter (cm) | Petal length (cm) | Petal width (cm) | Leaf length (cm) | Leaf width (cm) |
|-------------|------------------|-------------------|----------------------|-------------------|------------------|------------------|-----------------|
| 36-1        | 5.33 b           | 1.68 m            | 6.87 bcdefg          | 3.27 cdef         | 1.75 fgh         | 7.43 i           | 2.77 fg         |
| 36-2        | 5.67 b           | 1.46 n            | 6.63 defg            | 3.17 cdef         | 1.88 defgh       | 7.18 i           | 3.03 e          |
| 36-3        | 5.67 b           | 1.88 efg          | 7.17 bcdef           | 3.50 bcde         | 1.70 fgh         | 7.83 h           | 2.73 fgh        |
| 36-4        | 5.67 b           | 1.73 lm           | 7.03 bcdefg          | 3.33 bcdef        | 1.97 cdefg       | 7.20 i           | 2.50 hij        |
| 36-5        | 6.33 b           | 1.52 n            | 6.67 cdefg           | 3.20 cdef         | 1.67 ghi         | 8.07 fgh         | 3.02 e          |
| 36-6        | 6.33 b           | 1.44 o            | 6.30 g               | 3.00 fg           | 1.35 i           | 7.47 i           | 2.73 fgh        |
| 36-7        | 6.00 b           | 1.80 hijk         | 7.10 bcdefg          | 3.43 bcdef        | 1.97 cdefg       | 7.95 gh          | 3.03 e          |
| 36-8        | 5.67 b           | 1.48 n            | 6.47 fg              | 3.10 def          | 1.83 efgh        | 7.48 i           | 2.77 fg         |
| 51-1        | 5.33 b           | 1.80 ijkl         | 7.13 bcdefg          | 3.33 bcdef        | 2.00 bcdefg      | 8.17 efg         | 3.23 e          |
| 51-2        | 6.00 b           | 1.49 n            | 6.47 fg              | 3.07 ef           | 1.97 cdefg       | 7.22 i           | 3.73 cd         |
| 51-3        | 5.83 b           | 2.03 d            | 7.50 bcd             | 3.57 bcde         | 2.20 abcd        | 7.33 i           | 3.73 cd         |
| 51-4        | 5.67 b           | 1.94 e            | 7.30 bcdef           | 3.53 bcde         | 1.90 cdefgh      | 7.45 i           | 3.63 d          |
| 51-5        | 5.83 b           | 1.52 n            | 6.57 efg             | 3.17 cdef         | 1.94 cdefg       | 8.03 fgh         | 3.83 cd         |
| 51-6        | 5.67 b           | 1.86 fgh          | 7.10 bcdefg          | 3.50 bcde         | 2.02 bcdef       | 7.48 i           | 3.65 cd         |
| 51-7        | 5.50 b           | 1.70 m            | 6.90 bcdefg          | 3.43 bcdef        | 2.20 abcd        | 7.83 h           | 3.87 c          |
| 51-8        | 5.67 b           | 1.89 ef           | 7.20 bcdef           | 3.50 bcde         | 2.33 ab          | 7.47 i           | 4.13 b          |
| 29-1        | 5.83 b           | 2.01 d            | 7.47 bcd             | 3.80 ab           | 1.87 defgh       | 8.27 cdef        | 2.53 ghij       |
| 29-2        | 5.33 b           | 1.75 jklm         | 7.03 bcdefg          | 3.40 bcdef        | 1.85 efgh        | 8.40 cde         | 2.45 ij         |
| 29-3        | 6.00 b           | 2.08 d            | 7.62 b               | 3.50 bcde         | 2.00 bcdefg      | 8.05 fgh         | 2.57 fghij      |
| 29-4        | 5.67 b           | 2.07 b            | 7.50 bc              | 3.62 bcd          | 1.60 hi          | 8.53 c           | 2.75 fg         |
| 29-5        | 6.67 b           | 2.22 c            | 8.40 a               | 4.10 a            | 1.83 efgh        | 8.83 b           | 3.20 e          |
| 29-6        | 5.83 b           | 1.83 ghi          | 7.20 bcdef           | 3.57 bcde         | 1.73 fgh         | 8.07 fgh         | 2.53 ghij       |
| 29-7        | 6.00 b           | 1.72 m            | 6.97 bcdefg          | 3.30 bcdef        | 2.03 bcdef       | 8.20 defg        | 2.79 f          |
| 29-8        | 5.33 b           | 1.91 ef           | 7.23 bcdef           | 3.47 bcdef        | 2.13 abcde       | 8.55 c           | 2.77 fg         |
| 70-1        | 6.00 b           | 1.92 e            | 7.23 bcdef           | 3.43 bcdef        | 1.83 efgh        | 7.95 gh          | 2.48 ij         |
| 70-2        | 6.17 b           | 2.04 d            | 7.53 bc              | 3.65 bc           | 1.72 fgh         | 8.47 cd          | 2.77 fg         |
| 70-3        | 5.67 b           | 2.06 d            | 7.55 b               | 3.80 ab           | 1.90 cdefgh      | 8.30 cdef        | 2.77 fg         |
| 70-4        | 5.33 b           | 2.05 d            | 7.53 b               | 3.60 bcd          | 1.90 cdefgh      | 8.03 fgh         | 2.60 fghij      |
| 70-5        | 5.33 b           | 1.74 klm          | 7.03 bcdefg          | 3.57 bcde         | 1.97 cdefg       | 7.85 h           | 2.58 fghij      |
| 70-6        | 5.67 b           | 1.80 hij          | 7.10 bcdefg          | 3.53 bcde         | 1.80 efgh        | 8.20 defg        | 2.67 fghi       |
| 70-7        | 5.33 b           | 1.69 m            | 7.03 bcdefg          | 3.18 cdef         | 1.93 cdefgh      | 8.37 cde         | 2.50 hij        |
| 70-8        | 5.83 b           | 1.71 m            | 6.90 bcdefg          | 3.33 bcdef        | 1.93 cdefgh      | 8.15 efg         | 2.37 j          |
| Pelion      | 25.67 a          | 4.46 b            | 6.63 defg            | 2.63 g            | 2.23 abc         | 7.30 i           | 3.70 cd         |
| Joy         | 6.67 b           | 1.94 e            | 7.17 bcdefg          | 3.37 bcdef        | 2.03 bcdef       | 8.87 b           | 4.20 b          |
| Grandiflora | 24.33 a          | 5.55 a            | 7.40 bcde            | 3.53 bcde         | 2.47 a           | 10.38 a          | 5.47 a          |
| Kimberly    | 25.33 a          | 5.51 a            | 7.30 bcdef           | 3.43 bcdef        | 2.40 a           | 10.25 a          | 5.33 a          |

Different letters in columns for each of the traits indicate statistically significant differences among the genotypes according to Tukey's multiple comparison test at  $p < 0.05$ .

**Table S4.** Mean values (numerical) of the major volatile compounds of flower petals (jasminelactone, linalool,  $\alpha$ -farnesene, benzyl tiglate and cis-3-hexenyltiglate) identified with GC-MS in the 32 seed-derived genotypes and the four reference cultivars of *G. jasminoides*.

| Genotype    | jasminelactone<br>( $\mu\text{g/g}$ ) | linalool<br>( $\mu\text{g/g}$ ) | $\alpha$ -farnesene<br>( $\mu\text{g/g}$ ) | benzyl tiglate<br>( $\mu\text{g/g}$ ) | cis-3-<br>hexenyltiglate<br>( $\mu\text{g/g}$ ) |
|-------------|---------------------------------------|---------------------------------|--------------------------------------------|---------------------------------------|-------------------------------------------------|
| 36-1        | 1.335 b                               | 0.032 lmn                       | 0.123 klmno                                | 0.069 def                             | 0.041 fg                                        |
| 36-2        | 0.866 defg                            | 0.078 ijklm                     | 0.240 h                                    | 0.013 j                               | 0.052 de                                        |
| 36-3        | 0.530 ijk                             | 0.124 ghij                      | 0.115 mno                                  | 0.040 fghij                           | 0.028 hijkl                                     |
| 36-4        | 0.981 cdef                            | 0.126 ghij                      | 0.285 gh                                   | 0.062 efgh                            | 0.062 cd                                        |
| 36-5        | 1.336 b                               | 0.048 klmn                      | 0.178 ij                                   | 0.047 fghij                           | 0.042 efg                                       |
| 36-6        | 0.192 lm                              | 0.088 hijkl                     | 0.124 klmn                                 | 0.039 fghij                           | 0.071 c                                         |
| 36-7        | 0.251 lm                              | 0.070 jklmn                     | 0.052 pq                                   | 0.041 fghij                           | 0.060 cd                                        |
| 36-8        | 1.050 cd                              | 0.267 f                         | 0.186 ij                                   | 0.026 ghij                            | 0.065 c                                         |
| 51-1        | 0.400 kl                              | 0.543 b                         | 0.115 mno                                  | 0.062 efg                             | 0.041 fg                                        |
| 51-2        | 0.214 lm                              | 0.121 ghij                      | 0.080 mnop                                 | 0.011 j                               | 0.014 mn                                        |
| 51-3        | 1.038 cd                              | 0.392 d                         | 0.071 nop                                  | 0.045 fghij                           | 0.034 ghi                                       |
| 51-4        | 0.722 fghij                           | 0.011 n                         | 0.167 ijkl                                 | 0.016 j                               | 0.036 fgh                                       |
| 51-5        | 0.595 hijk                            | 0.518 bc                        | 0.082 mnop                                 | 0.050 fghij                           | 0.033 ghij                                      |
| 51-6        | 0.888 defg                            | 0.164 g                         | 0.310 gh                                   | 0.037 fghij                           | 0.028 hijkl                                     |
| 51-7        | 0.744 efghij                          | 0.014 mn                        | 0.107 mno                                  | 0.018 ij                              | 0.040 fg                                        |
| 51-8        | 1.605 a                               | 0.664 a                         | 0.602 a                                    | 0.321 a                               | 0.182 a                                         |
| 29-1        | 1.022 cd                              | 0.530 bc                        | 0.171 ijk                                  | 0.120 c                               | 0.028 hijkl                                     |
| 29-2        | 0.240 lm                              | 0.274 f                         | 0.174 ijk                                  | 0.014 j                               | 0.017 lmn                                       |
| 29-3        | 0.110 m                               | 0.078 ijklm                     | 0.016 q                                    | 0.021 ij                              | 0.016 lmn                                       |
| 29-4        | 0.508 jk                              | 0.115 ghij                      | 0.014 q                                    | 0.034 fghij                           | 0.019 klmn                                      |
| 29-5        | 0.710 fghij                           | 0.473 c                         | 0.405 cd                                   | 0.100 cd                              | 0.095 b                                         |
| 29-6        | 0.688 ghij                            | 0.026 lmn                       | 0.048 pq                                   | 0.026 ghij                            | 0.011 mn                                        |
| 29-7        | 0.089 m                               | 0.245 f                         | 0.122 klmno                                | 0.091 cde                             | 0.009 n                                         |
| 29-8        | 0.790 defghi                          | 0.536 b                         | 0.163 ijkl                                 | 0.023 hij                             | 0.013 mn                                        |
| 70-1        | 0.525 ijk                             | 0.043 klmn                      | 0.033 pq                                   | 0.033 fghij                           | 0.010 n                                         |
| 70-2        | 1.327 b                               | 0.522 bc                        | 0.338 ef                                   | 0.019 ij                              | 0.012 mn                                        |
| 70-3        | 1.000 cde                             | 0.048 klmn                      | 0.436 bc                                   | 0.013 j                               | 0.016 mn                                        |
| 70-4        | 0.582 hijk                            | 0.333 e                         | 0.083 mnop                                 | 0.056 efghi                           | 0.036 gh                                        |
| 70-5        | 0.380 kl                              | 0.077 ijklm                     | 0.356 ef                                   | 0.038 fghij                           | 0.012 mn                                        |
| 70-6        | 1.178 bc                              | 0.359 d                         | 0.372 de                                   | 0.045 fghij                           | 0.015 mn                                        |
| 70-7        | 0.951 cdefg                           | 0.257 f                         | 0.053 pq                                   | 0.021 ij                              | 0.022 jklm                                      |
| 70-8        | 0.835 defgh                           | 0.225 f                         | 0.069 op                                   | 0.012 j                               | 0.018 lmn                                       |
| Pelion      | 1.200 bc                              | 0.107 ghijk                     | 0.133 jklm                                 | 0.198 b                               | 0.023 ijklm                                     |
| Joy         | 0.563 hijk                            | 0.139 ghi                       | 0.456 b                                    | 0.060 efgh                            | 0.037 fgh                                       |
| Grandiflora | 1.157 bc                              | 0.153 g                         | 0.254 h                                    | 0.167 b                               | 0.048 ef                                        |
| Kimberly    | 1.163 bc                              | 0.148 gh                        | 0.107 mno                                  | 0.180 b                               | 0.030 ghijk                                     |

Different letters in columns for each of the volatile compounds indicate statistically significant differences among the genotypes according to Tukey's multiple comparison test at  $p < 0.05$ .
